# Supplementary material
Source: PubMed Central journal article supplement (PMC4663159)
Supplement: NIHMS714183-supplement-supplement_1.pdf [file NIHMS714183-supplement-supplement_1.pdf]

## **Supplementary Materials and Methods**

### ***Animals***

*Duoxa*<sup>-/-</sup> and gender-matched wt littermates were cohoused (3-5 animals/cage) in microisolator cages under SPF conditions <sup>1</sup>. Food and water were supplied ad libitum, with the latter including a supplemental dose of L-thyroxine to maintain euthyroidism of *Duoxa*<sup>-/-</sup> mice <sup>2</sup>. For experiments involving *Duoxa*-deficient mice, animals used were in a pure 129S6 genetic background, except for studies shown in Fig. S9 and S12 that employed mice backcrossed for ten generations into C57BL6 background. All of the latter were confirmed to be homozygous carriers of the G169D *Slc11a1* variant (rs47476426) genotyped using a HypCH4III endonuclease (New England Biolabs) restriction fragment length polymorphism. *Il22*<sup>-/-</sup>, *Il23r*<sup>-/-</sup>, and *RORgt*<sup>-/-</sup> mice (all in B6 background) have been described previously <sup>3-5</sup>. C57BL6 mice with distinct resident microbiota were purchased from Taconic Farms and Jackson Laboratory, respectively. For all studies, mice were used at 9-12 weeks of age. Studies were approved by the University of Michigan Institutional Animal Care and Use Committee (PRO-00004497 and PRO-00002436).

### ***Mono-association of mice with SFB***

GF mice were aseptically transferred to microisolator cages and housed in sterile laminar-flow hoods. Mice were orally gavaged with a freshly prepared suspension of frozen cecal material from SFB<sup>mono</sup> mice <sup>6</sup> or GF controls. Tissues were collected one week following treatment. All mice remained bacteriologically sterile except for the presence of SFB (unculturable, positive gram-staining) in monocolonized mice.

### ***Tissue collection***

Animals were euthanized by isoflurane overdose. MLN, liver and spleen were harvested aseptically. Intestinal segments were collected from the duodenum (immediately following the

pylorus), jejunum (halfway between stomach and cecum), ileum (terminal portion), colon (midportion) and rectum. The isolated segments were opened longitudinally and rinsed thrice with PBS. Samples for nucleic acid extraction were snap frozen in liquid nitrogen. Samples for paraffin-embedding were fixed in 10% formalin. For cryosectioning, samples were snap-frozen in Tissue-Tek O.C.T. compound (Andwin Scientific, Woodland Hills, CA).

### ***Histology and morphometric analysis***

Serial 4  $\mu\text{m}$  sections of formalin-fixed paraffin-embedded samples were stained with H&E. For morphometry, the terminal ileum was scored for height of villi and depth of crypts on transverse sections at 200 $\times$  magnification (Figure S7). For each animal, mean values were determined from at least 10 well oriented villus-crypt units. To assess mucosal macrophage accumulation, sections were histochemically stained for F4/80 (clone A3-1; 1:200; Abcam ab6640) and counterstained with hematoxylin. Average F4/80-positive cell number per villus-crypt unit was determined by analyzing at least 20 villus-crypt units per animal.

### ***Real-time reverse transcription PCR (RT-qPCR)***

Total RNA was prepared using TRIzol reagent, treated with deoxyribonuclease and cleaned up on RNeasy spin columns (Qiagen). RNA was reverse transcribed with Superscript II (Life Technologies) using random hexamer priming. Concentration and purity of RNA preparations were determined on a NanoDrop ND-1000 UV spectrophotometer. PCR amplifications were performed using a C1000 Thermal Cycler (Bio-Rad) with SYBR Green dye (Molecular Probes, Carlsbad, CA) and Platinum Taq DNA polymerase (Invitrogen). Each reaction was performed in triplicates with the following conditions: 1 min at 95°C, 40 cycles of 10 s at 95°C and 1 min at 65°C. Amplification specificity was confirmed by melting curve analysis of products. Gene expression of host genes was normalized to *Hprt1* mRNA. Expression stability of *Hprt1* was confirmed for all samples by comparison with a second house keeping gene, *Polr2a*. The

expression of SFB genes was normalized to SFB-specific 16S rRNA. Primer sequences are listed in Supplementary Table S15.

### ***Microarray-based gene expression profiling***

Total RNA was prepared using TRIzol reagent, treated with deoxyribonuclease and cleaned up on RNeasy spin columns (Qiagen). RNA integrity numbers (RIN) were determined using a Bioanalyzer instrument (Agilent Technologies) and ranged from 9.2 to 9.6 (mean: 9.5) with 28S/18S ratios between 1.8 and 1.9. Target labeled cRNA were hybridized to GeneChip Mouse Genome 430 2.0 arrays (Affymetrix). Data were normalized with the RMA procedure using the affy package of Bioconductor implemented in the R statistical language. The dataset is accessible from the NCBI's Gene Expression Omnibus through series GSE60933. For GSEA <sup>7</sup>, genes regulated by SFB colonization were selected from GSE18348 <sup>8</sup> based on 2.5-fold upregulation or 2-fold downregulation (unadjusted  $P < .05$ ) in the comparisons of SFB<sup>mono</sup> mice with GF mice and cohoused B6-Jax (+B6-Tac) with B6-Jax mice, respectively. Genes significantly up- or downregulated in the non-affected ilea of patients with cCD compared to ilea of healthy controls have been reported by Haberman et al. <sup>9</sup> (GSE57945). Genes were ranked by geometric means of expression ratios of cohoused *Duoxa*<sup>-/-</sup> and wt controls. Significance of the enrichment score was calculated from 1000 random, size-matched gene set permutations.

### ***DNA isolation and 16S qPCR***

Genomic DNA was extracted from tissue samples as described <sup>10</sup>. Phyla-specific PCR primers (Table S15) were used under validated conditions <sup>11-14</sup>. Relative bacterial loads were compared using the 2<sup>- $\Delta\Delta$ Ct</sup> method by normalizing 16S signal to the host DNA amplification signal.

### ***16S rRNA in situ hybridization and immunostaining of tissue sections***

For staining of frozen sections, thawed 8  $\mu$ m sections were briefly fixed in 4% freshly prepared

formaldehyde for 5 min, washed twice in PBS, and then blocked with 20% donkey serum in PBS. Primary antibodies used were a pan-DUOX antiserum (1:1,000) <sup>15</sup> or normal rabbit IgG (control; Santa Cruz Biotechnology, Santa Cruz, CA), an anti-*Salmonella* Typhimurium LPS monoclonal antibody (clone 1E6; 1:1,000) (GeneTex), and rat anti-E-cadherin (1:2,000) (Life Technologies). The staining was developed using Alexa Fluor-conjugated secondary antibodies (Life Technologies) and DNA counterstained with DAPI.

Sequential in 16S rRNA situ hybridization and immunodetection followed protocols outlined previously in detail <sup>16</sup>. Briefly, Carnoy's solution-fixed sections were hybridized in a humid chamber for 2 hours at 50°C with 5 ng/μl Alexa Fluor 488 labeled oligonucleotide SFB1008 (AF488-5'- GCGAGCTTCCCTCATTACAAGG-3') <sup>11</sup> in a formamide-free hybridization buffer. Following washes in hybridization buffer and PBS, sections were blocked and stained for DUOX protein as described above.

### **Enteric *Salmonella* Typhimurium infection model**

*Salmonella enterica* serovar Typhimurium (strain SL1344) was grown at 37°C with shaking (150 rpm) in Luria-Bertani (LB) broth containing 100 μg/ml streptomycin. In the streptomycin-pretreated model <sup>17</sup>, mice in 129S6 background were given 20 mg streptomycin orally followed 24 hours later by oral gavage with 10<sup>7</sup> cfu *S. Typhimurium* (1 OD<sub>600</sub> ~ 6x10<sup>8</sup> cfu/ml) in Hepes buffer (100 mM, pH 8.0) or with sterile buffer alone. In the typhoid model, mice in C57BL6 background received 10<sup>7</sup> cfu *S. Typhimurium* by oral gavage without prior antibiotic pretreatment. Mice were euthanized 24 hours following infection. Livers were removed aseptically followed by collection of intestinal content from ileum, cecum, and colon. All samples were weighed and homogenized in 4°C cold PBS/0.1% Triton X-100. Cfus were determined by culturing serial dilutions on LB agar plates with 100 μg/ml streptomycin.

### ***In vivo* intestinal permeability assay**

Intestinal permeability was assessed by measuring the enteral uptake of fluorescein isothiocyanate-conjugated dextran (FD4, 4 kDa, Sigma)<sup>18</sup>. Serum was obtained four hours after gavage with FD4 (0.6 mg per gram body weight). Serum FD4 levels were determined by fluorometry (ex/em, 490/530 nm) using standards serially diluted in mouse serum.

### ***Ileal enteroid culture***

The enteroid culture method was modified from the study by Sato et al.<sup>19</sup> The excised mouse ileum (~6 cm) was opened longitudinally, rinsed with PBS, then incubated in ice-cold PBS containing 3 mM EDTA for 30 min at 4°C. After manual shaking for 30 sec, the tissue was moved to fresh cold PBS and shaken for 2 min. The tissue fragments were allowed to settle and the supernatant was collected and passed through a 70- $\mu$ m cell strainer to remove tissue fragments. Crypts were separated from suspended single cells by centrifugation at 150 g (2 min). The crypt pellet was resuspended with Matrigel (BD Bioscience) for seeding into 24 well plates (50  $\mu$ l drop per well). After polymerization of the Matrigel, 0.5 ml culture medium composed of advanced DMEM/F12 supplemented with HEPES (10mM), N2-supplement (1:100), B-27 supplement (1:50), L-glutamine (1:100), penicillin/streptomycin (1:100), 500 ng/ml R-spondin1, 100 ng/ml noggin, 50 ng/ml Wnt-3a and 100 ng/ml epidermal growth factor was added (all from Life Technologies). The media and growth factors (except for Wnt-3a) were changed every 4 days. For passage at 7–10 days post-plating, wells were rinsed twice with ice-cold PBS. Matrigel containing the enteroids was resuspended in PBS and passed once through a 30 gauge needle. Enteroid fragments were pelleted at 200 g (1 min), washed once with ice-cold DMEM/F12, centrifuged again, and resuspended in Matrigel for plating.

Enteroids were stimulated by incubation in growth medium containing either recombinant murine IL-22 (50 ng/ml) or TNF $\alpha$  (60 ng/ml) (R&D Systems) for 18 hours. For immunostaining, washed enteroids were fixed in 1% freshly prepared formaldehyde (5 min), washed again, and

snap frozen in O.C.T. compound. For mRNA expression studies, culture medium was aspirated and the matrigel drop containing enteroids directly homogenized in TRIzol for subsequent RNA extraction.

### ***DSS-induced intestinal inflammation model***

To induce intestinal inflammation by dextran sulfate sodium salt (DSS), cohoused *Duoxa*<sup>-/-</sup> and wt littermates received drinking water with 3% DSS (36–50 kDa; MP Biomedicals) (refreshed daily). To test whether DUOX status affects the extent of epithelial damage and/or epithelial wound healing in this model, mice were exposed to DSS for seven days, followed by one day on regular drinking water to initiate epithelial restitution. The mice were checked each day for morbidity and their weights were recorded. In vivo permeability assay was performed as described above (*in vivo intestinal permeability assay*). Weight loss and recovery were indistinguishable between *Duoxa*<sup>-/-</sup> and wt mice exposed to repeat DSS cycles (Figure S10).

### ***Colonization of mice with healthy and dysbiotic human fecal microbiota***

Since mucosal dysbiosis in CD patients is not typically reflected by pronounced shifts in the microbial composition in the lumen<sup>24</sup>, dysbiotic fecal samples were obtained from patients with active ulcerative colitis (dysbiosis at the family/phylum level confirmed by Illumina 16S rRNA sequencing; data not shown). Frozen stool samples from patients and healthy control donors were resuspended under anaerobic conditions and used to infect individual GF mice by gavage. Samples from the proximal colon were analyzed two weeks following microbial challenge.

### ***Western blotting***

Tissue samples were homogenized in Tissue Protein Extraction Reagent (T-PER, Thermo Scientific) containing a cocktail of protease inhibitors (Complete; Roche Applied Science) and incubated for 1 h at 4°C. The lysates was centrifuged 15 min at 10,000 rpm and concentration of

total soluble protein determined using the bicinchoninic acid method (BCA; Life Technologies). Equal amounts of solubilized proteins were diluted 3:1 in 4x reducing Laemmli buffer (BioRad) before loading and separation by SDS-PAGE electrophoresis. DUOX proteins were detected with pan-DUOX antibody (1:2,000) <sup>15</sup> and  $\beta$ -actin was detected as loading control (mAb C4; Santa Cruz Biotechnologies). For densitometry of bands, average density profile plots for individual lanes were generated and the peak areas above background level measured using the wand tool in ImageJ software <sup>20</sup>.

### **Statistics**

Log-transformed expression data from unpaired groups were analyzed using Welch's t-test (multiple comparisons adjustment: Bonferroni) or with one-way ANOVA and Bonferroni post-hoc tests. The Wilcoxon matched-pairs signed-rank test was used to test for differences between genotype groups in mixed housing experiments. Each cage was analyzed as a pair of the means obtained in *Duoxa*<sup>-/-</sup> and cohoused wt littermates (n=2-3 mice per genotype and cage). Data were analyzed using GraphPad Prism 6.0 (San Diego, CA).

## Supplementary References

1. Grasberger H, El-Zaatari M, Dang DT, et al. Dual oxidases control release of hydrogen peroxide by the gastric epithelium to prevent *Helicobacter felis* infection and inflammation in mice. *Gastroenterology* 2013;145:1045-54.
2. Grasberger H, De Deken X, Mayo OB, et al. Mice deficient in dual oxidase maturation factors are severely hypothyroid. *Mol Endocrinol* 2012;26:481-92.
3. Zheng Y, Valdez PA, Danilenko DM, et al. Interleukin-22 mediates early host defense against attaching and effacing bacterial pathogens. *Nat Med* 2008;14:282-9.
4. Cox JH, Kljavin NM, Ota N, et al. Opposing consequences of IL-23 signaling mediated by innate and adaptive cells in chemically induced colitis in mice. *Mucosal Immunol* 2012;5:99-109.
5. Eberl G, Marmon S, Sunshine MJ, et al. An essential function for the nuclear receptor RORgamma(t) in the generation of fetal lymphoid tissue inducer cells. *Nat Immunol* 2004;5:64-73.
6. Umesaki Y, Okada Y, Matsumoto S, et al. Segmented filamentous bacteria are indigenous intestinal bacteria that activate intraepithelial lymphocytes and induce MHC class II molecules and fucosyl asialo GM1 glycolipids on the small intestinal epithelial cells in the ex-germ-free mouse. *Microbiol Immunol* 1995;39:555-62.
7. **Subramanian A, Tamayo P**, Mootha VK, et al. Gene set enrichment analysis: a knowledge-based approach for interpreting genome-wide expression profiles. *Proc Natl Acad Sci U S A* 2005;102:15545-50.
8. **Ivanov, II, Atarashi K**, Manel N, et al. Induction of intestinal Th17 cells by segmented filamentous bacteria. *Cell* 2009;139:485-98.
9. Haberman Y, Tickle TL, Dexheimer PJ, et al. Pediatric Crohn disease patients exhibit specific ileal transcriptome and microbiome signature. *J Clin Invest* 2014;124:3617-33.
10. Gilliland MG, 3rd, Erb-Downward JR, Bassis CM, et al. Ecological succession of



- bacterial communities during conventionalization of germ-free mice. *Appl Environ Microbiol* 2012;78:2359-66.
11. Snel J, Heinen PP, Blok HJ, et al. Comparison of 16S rRNA sequences of segmented filamentous bacteria isolated from mice, rats, and chickens and proposal of "Candidatus *Arthromitus*". *Int J Syst Bacteriol* 1995;45:780-2.
  12. Bacchetti De Gregoris T, Aldred N, Clare AS, et al. Improvement of phylum- and class-specific primers for real-time PCR quantification of bacterial taxa. *J Microbiol Methods* 2011;86:351-6.
  13. Matsuda K, Tsuji H, Asahara T, et al. Sensitive quantitative detection of commensal bacteria by rRNA-targeted reverse transcription-PCR. *Appl Environ Microbiol* 2007;73:32-9.
  14. Huijsdens XW, Linskens RK, Mak M, et al. Quantification of bacteria adherent to gastrointestinal mucosa by real-time PCR. *J Clin Microbiol* 2002;40:4423-7.
  15. De Deken X, Wang D, Many MC, et al. Cloning of two human thyroid cDNAs encoding new members of the NADPH oxidase family. *The Journal of biological chemistry* 2000;275:23227-33.
  16. Johansson ME, Hansson GC. Preservation of mucus in histological sections, immunostaining of mucins in fixed tissue, and localization of bacteria with FISH. *Methods Mol Biol* 2012;842:229-35.
  17. **Grassl GA, Valdez Y**, Bergstrom KS, et al. Chronic enteric salmonella infection in mice leads to severe and persistent intestinal fibrosis. *Gastroenterology* 2008;134:768-80.
  18. Napolitano LM, Koruda MJ, Meyer AA, et al. The impact of femur fracture with associated soft tissue injury on immune function and intestinal permeability. *Shock* 1996;5:202-7.
  19. Sato T, Vries RG, Snippert HJ, et al. Single *Lgr5* stem cells build crypt-villus structures in vitro without a mesenchymal niche. *Nature* 2009;459:262-5.

20. Schneider CA, Rasband WS, Eliceiri KW. NIH Image to ImageJ: 25 years of image analysis. *Nat Methods* 2012;9:671-5.
21. **Kuwahara T, Ogura Y**, Oshima K, et al. The lifestyle of the segmented filamentous bacterium: a non-culturable gut-associated immunostimulating microbe inferred by whole-genome sequencing. *DNA Res* 2011;18:291-303.
22. Pamp SJ, Harrington ED, Quake SR, et al. Single-cell sequencing provides clues about the host interactions of segmented filamentous bacteria (SFB). *Genome Res* 2012;22:1107-19.
23. Reimand J, Arak T, Vilo J. g:Profiler--a web server for functional interpretation of gene lists (2011 update). *Nucleic Acids Res* 2011;39:W307-15.
24. Gevers D, Kugathasan S, Denson LA, et al. The treatment-naive microbiome in new-onset Crohn's disease. *Cell Host & Microbe* 2014;15:382-392

Author names in bold designate shared co-first authors.

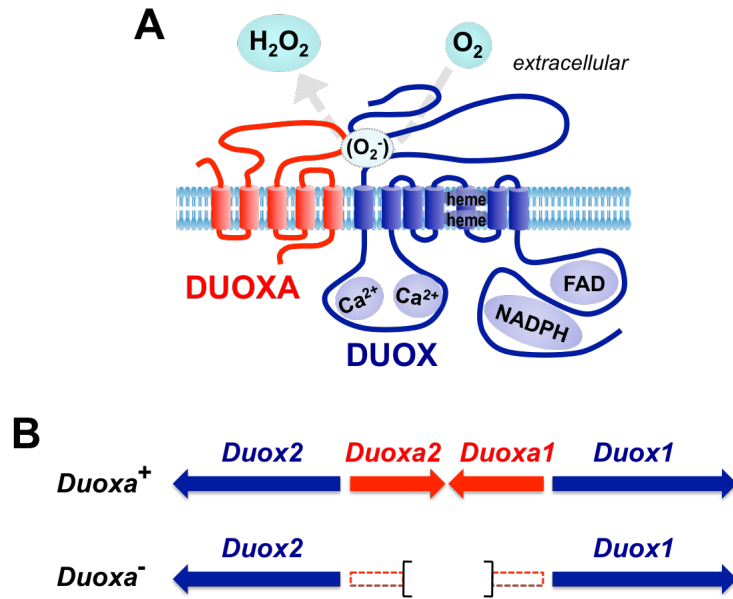

**Supplementary Figure S1.** Topology model of the DUOX/DUOXA complex and gene targeting strategy in *Duoxa*-deficient mice. (A) Topology model depicting the heterodimeric structure of a functional DUOX enzyme complex. (B) Arrangement of DUOX and DUOXA subunit genes on mouse chromosome 2 and targeting strategy to disrupt function of DUOX enzymes. *Duoxa*<sup>+</sup>, wt allele; *Duoxa*<sup>-</sup>, *Duoxa*-deficient allele.

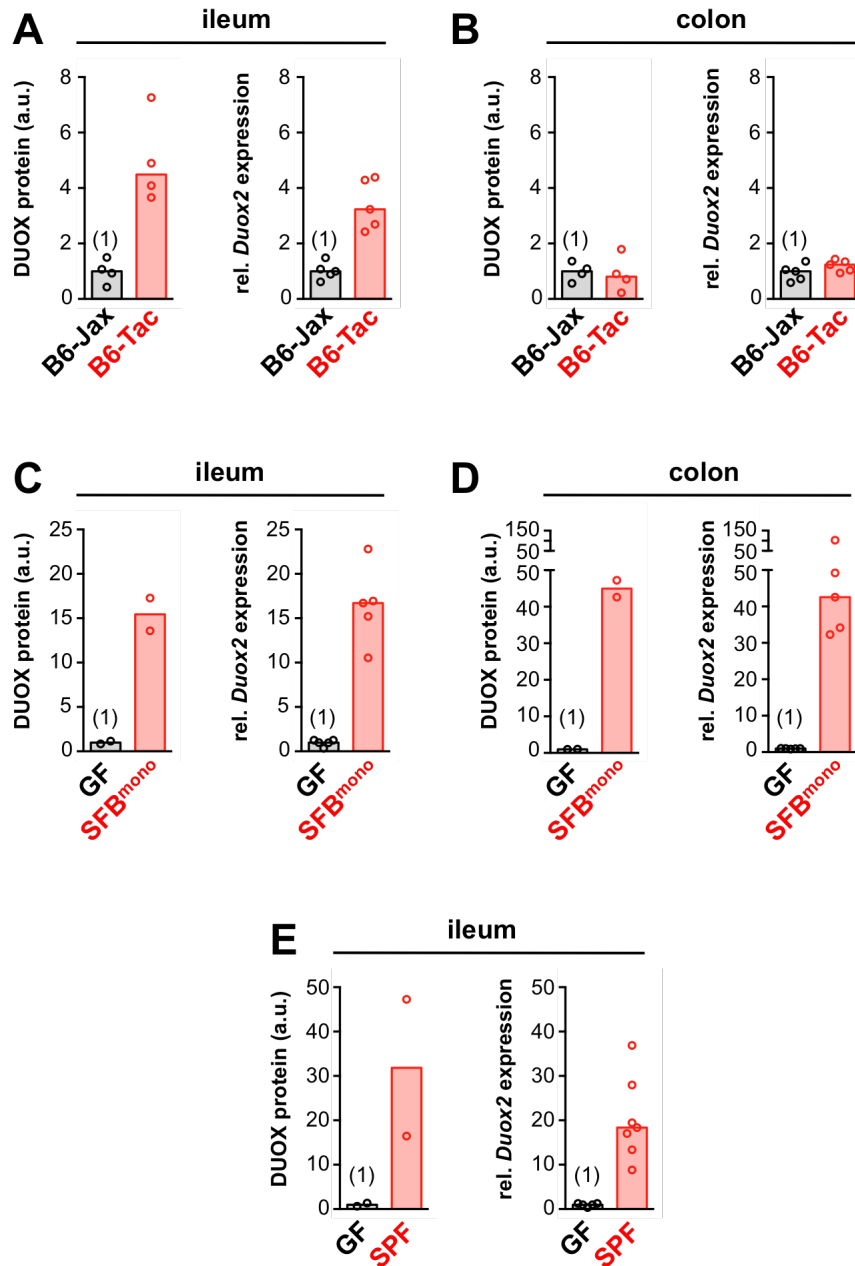

**Supplementary Figure S2.** Correspondence of DUOX protein expression with relative *Duox2* mRNA expression in mice associated with distinct microbiota. Relative DUOX protein expression was determined by densitometry of Western blots depicted in Figures 1 and 2 using ImageJ<sup>20</sup>. *a.u.*, arbitrary densitometric units.

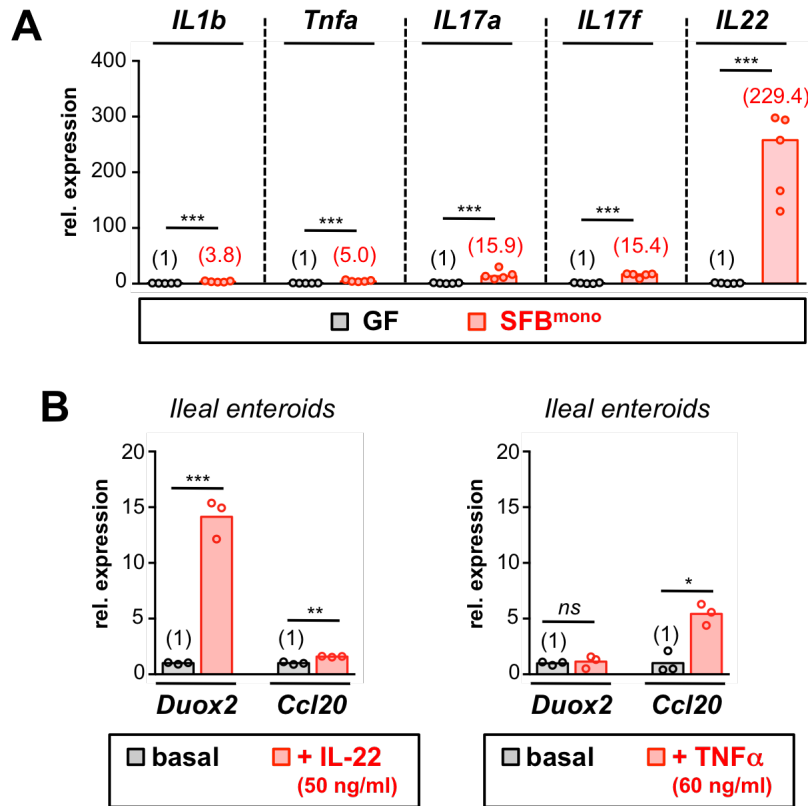

**Supplementary Figure S3.** (A) Induction of cytokines in the ileum of mice monocolonized for one week with SFB. *GF*, germ-free controls. (B) Ileal enteroids were treated for 18 hours with cytokines at the indicated concentration. Recombinant IL-22 but not TNF $\alpha$  is sufficient to robustly induce *Duox2* in vitro. \*\*\*,  $P < .001$ ; \*\*,  $P < .01$ ; \*,  $P < .05$ ; ns,  $P > .05$ .

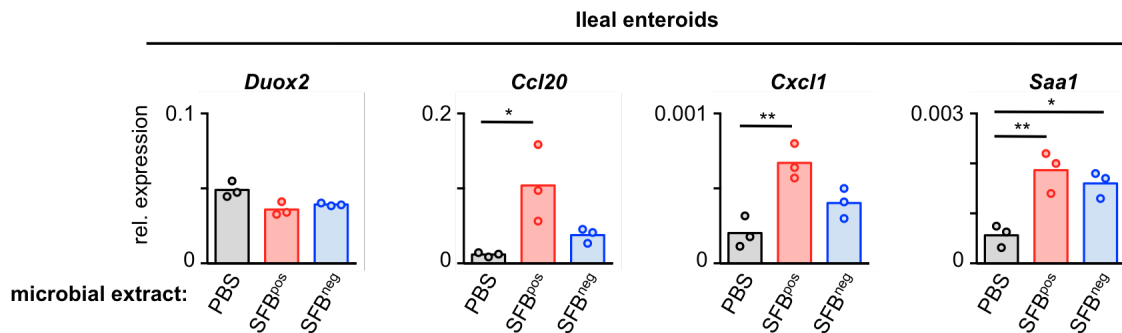

**Supplementary Figure S4.** Sterile microbial extracts do not induce *Duox2* expression in ileal enteroids. Sonicates of cecal contents of B6-Jax (SFB<sup>neg</sup>) and B6-Tac (SFB<sup>pos</sup>) mice were sterile-filtered (0.2  $\mu$ m) and added to ileal enteroids cultured in complete growth medium (20 mg original wet weight/ml medium). Expression of *Duox2*, *Ccl20*, *Cxcl1*, and *Saa1* were evaluated after exposure for 16 hours. \*,  $P < .05$ ; \*\*,  $P < .01$ .

NC\_015913.1 (*Candidatus Arthromitus* sp. SFB-mouse-Japan, complete genome)

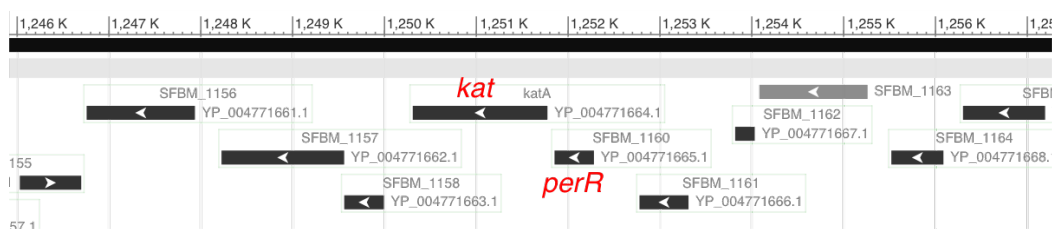

**Supplementary Figure S5.** Putative *perR-kat* operon in the SFB genome. Region of the SFB genome depicting the location of the *kat* (catalase) gene preceded by a putatively H<sub>2</sub>O<sub>2</sub>-sensitive transcriptional repressor (putative *perR*; *fur*-homolog sequence). This arrangement suggests a *perR-kat* operon for H<sub>2</sub>O<sub>2</sub>-induced derepression of *kat* providing a rationale for the observed DUOX2-dependent induction of SFB-*kat* in vivo.

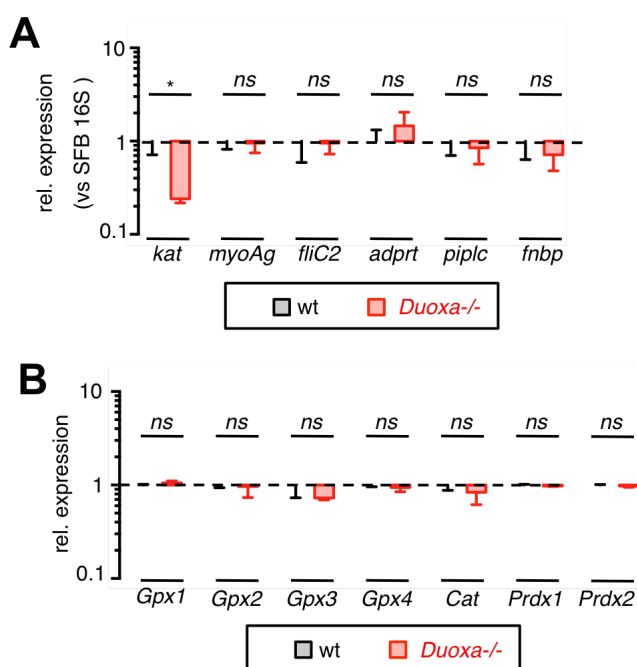

**Supplementary Figure S6.** Effect of DUOX status on anti-oxidative gene expression in ileal mucosa and mucosa-associated SFB. (A) Relative gene expression in mucosa-adherent SFB. *kat*, catalase (SFBM\_1159); *myoAg*, myosin-crossreactive antigen-like (SFBM\_0327); *fliC2*, flagellin (SFBM\_0642); *adprt*, adenin-phosphoribosyltransferase homolog (SFBSU\_007G84); *piplc*, phosphoinositide phospholipase C homolog (SFBM\_0755); *fnbp*, fibronectin-binding protein (SFBM\_0986). Except for *kat*, genes were selected based on a putative role in SFB-epithelial interaction<sup>21,22</sup>. (B) Relative ileal expression of antioxidant enzymes in DUOX intact (wt) vs DUOX deficient (*Duoxa*<sup>-/-</sup>) mice. Values represent mean±SEM of n=3 independent expression ratios (intra-cage comparisons). \*, *P*<.05; ns, *P*>.05.

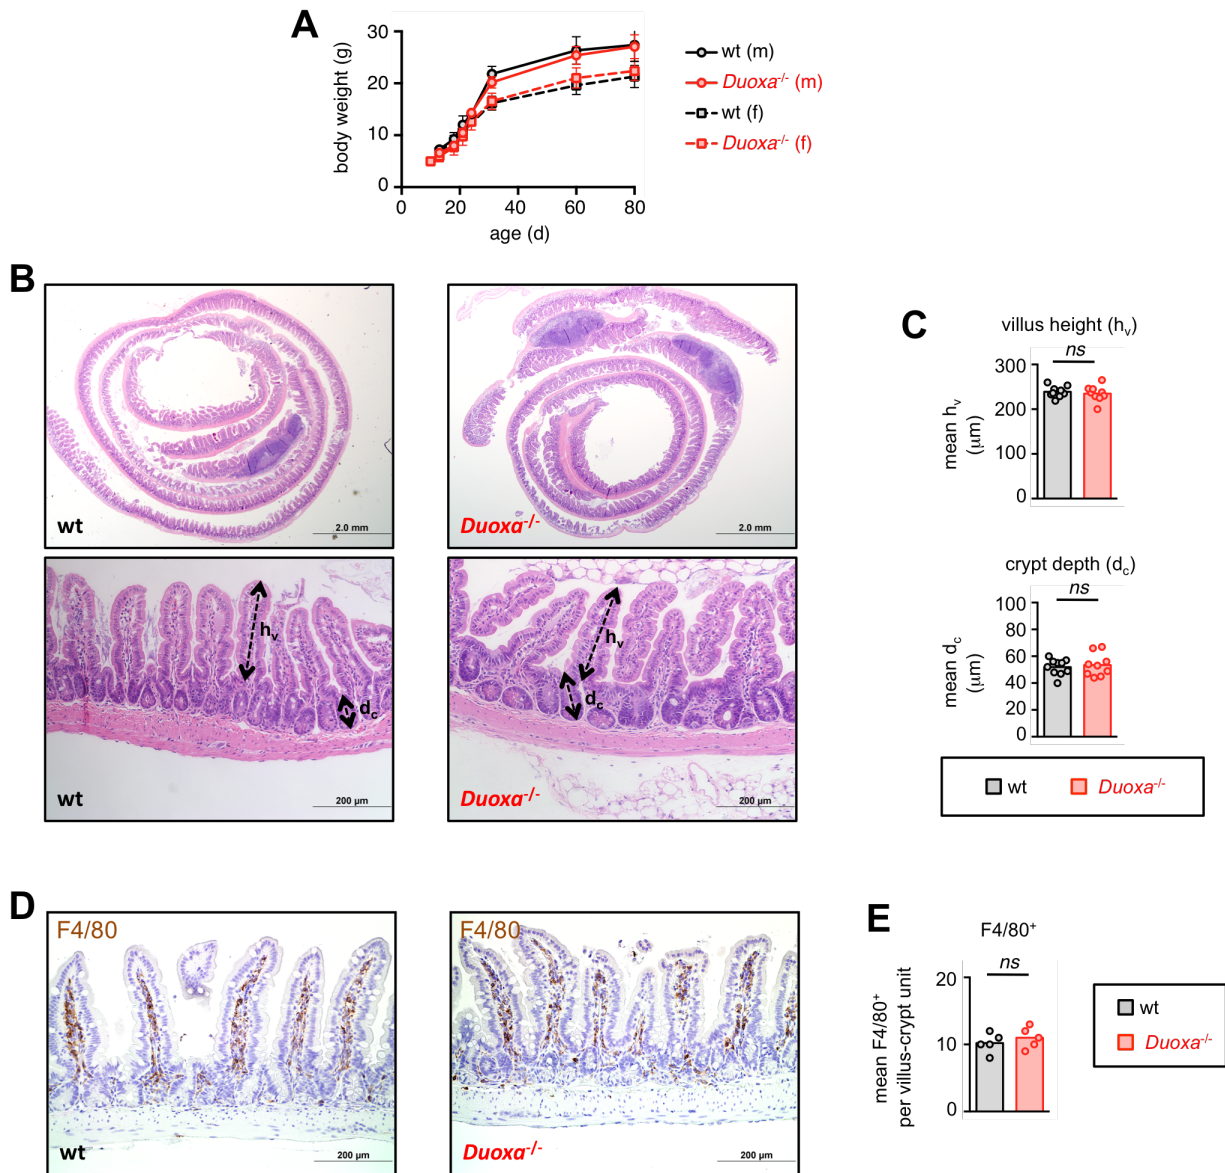

**Supplementary Figure S7.** Absence of DUOX activity in SPF mice does not lead to spontaneous intestinal inflammation. (A) Body weight gain of *Duoxa*<sup>-/-</sup> animals and wt littermates. Values indicate mean±SD of n=17-22 mice per group. *m*, males; *f*, females. (B) Exemplar hematoxylin and eosin stained sections of the small intestine of wt and *Duoxa*<sup>-/-</sup> littermates. Arrows in lower panels (20x objective magnification; ileum) indicate method of measurement of the height of villi ( $h_v$ ) and depth of crypts ( $d_c$ ). (C) Data show mean  $h_v$  and  $d_c$  values of wt (n=10) and *Duoxa*<sup>-/-</sup> (n=9) littermates. All mice were males, between 11-13 weeks of age. (D) Exemplar histochemical staining for the macrophage marker F4/80. Shown are transverse sections of the ileal mucosa of a wt and *Duoxa*<sup>-/-</sup> littermate pair. (E) Average number of F4/80-positive cells per villus-crypt unit. Values were determined by counting positive cells of at least 10 well-oriented villus-crypt units per animal. *ns*,  $P > .05$ .

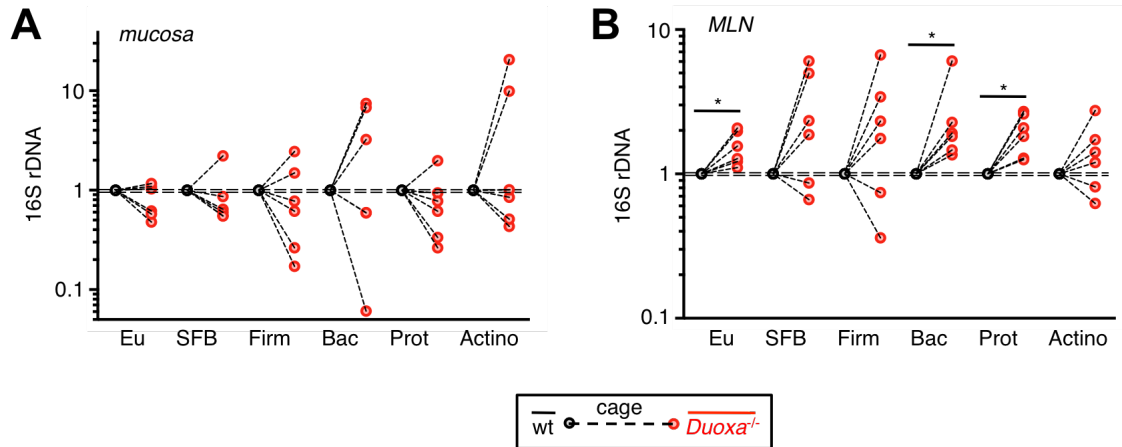

**Supplementary Figure S8.** Effect of DUOX status on bacterial DNA level in ileal mucosa and MLN. Relative level of group-specific 16S rDNA in ileal (A) and MLN (B) samples from *Duoxa*<sup>-/-</sup> and cohoused littermate controls. Dashed lines connect mean bacterial DNA level of *Duoxa*<sup>-/-</sup> and wt mice in intra-cage comparisons. For comparison between cages/litters, relative amounts were normalized within each cage (level in wt animals set to 1). *Eu*, eubacteria; *Firm*, Firmicutes; *Bac*, Bacteroidetes; *Prot*, Proteobacteria; *Actino*, Actinobacteria. \*,  $P < .05$ , two-sided Wilcoxon matched-pairs signed rank test.

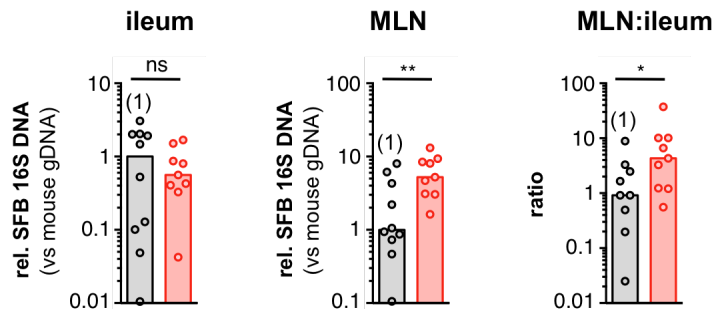

**Supplementary Figure S9.** Effect of DUOX status on bacterial DNA level in ileal mucosa and MLN in B6 mice. Relative level of 16S rDNA in ileal mucosal and MLN samples from *Duoxa*<sup>-/-</sup> and wt littermates in B6 genetic background. Mice from different litters were cohoused (mixed genotypes) after weaning. Bedding was mixed weekly between cages. Relative SFB 16S DNA level in MLN and ileal mucosa were determined in three months old mice by qPCR and normalized relative to the tissue genomic DNA level (mean level in wt mice set to 1). *ns*,  $P > .05$ ; \*,  $P < .05$ ; \*\*,  $P < .01$ ; Mann-Whitney test.



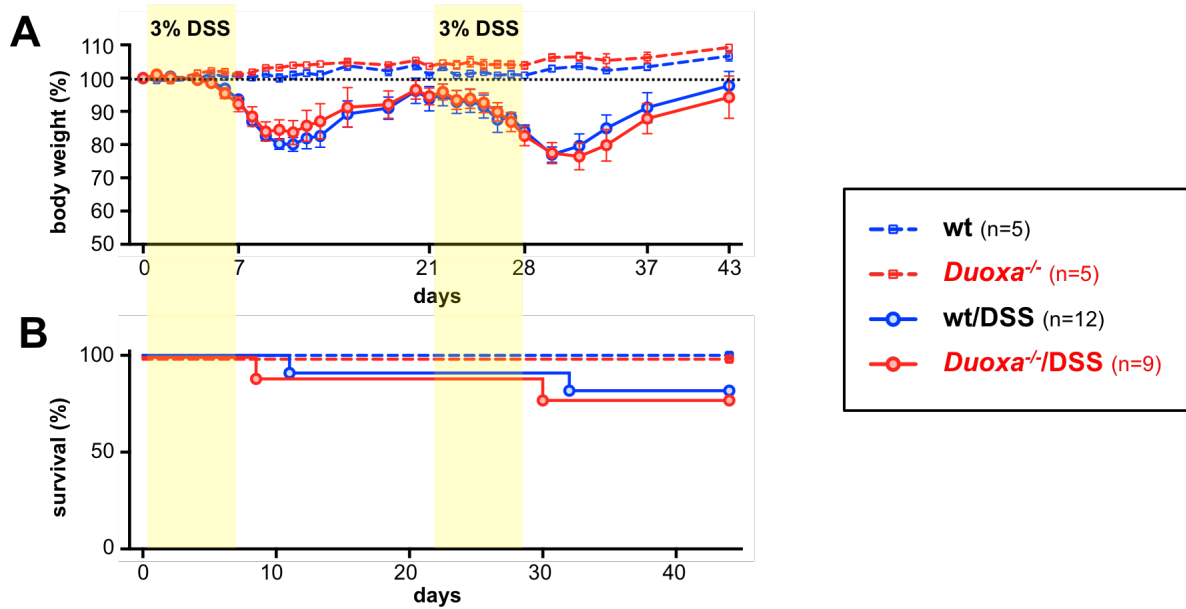

**Supplementary Figure S10.** Body weight change and survival in the DSS-induced intestinal inflammation model. Three months old mice (male 129S6) were treated with 7-day cycles of 3% DSS in drinking water followed by 14 days recovery period on regular drinking water. DSS-treated *Duoxa*<sup>-/-</sup> and wt mice did not differ in body weight change (A) or survival rate (B). Body weight data represent mean±SEM.

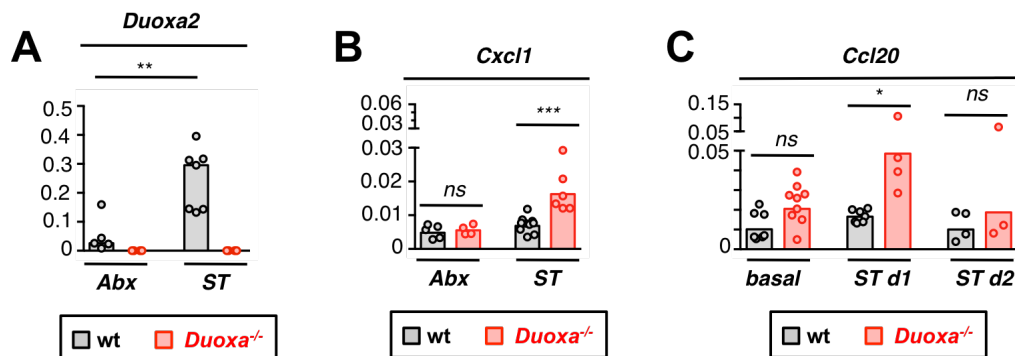

**Supplementary Figure S11.** Acute enteral *Salmonella* Typhimurium (ST) infection model. (A) Induction of *Duoxa2* expression in the ileum 24 hours following enteral infection with ST. Abx, sham-infected animals pretreated with streptomycin. (C, D) Ileal expression of epithelial chemokines *Cxcl1* and *Ccl20* during acute ST infection. \*\*\*,  $P < .001$ ; \*\*,  $P < .01$ ; \*,  $P < .05$ . Data were log-transformed before analysis to approximate Gaussian distribution. Bars indicate the geometric means.

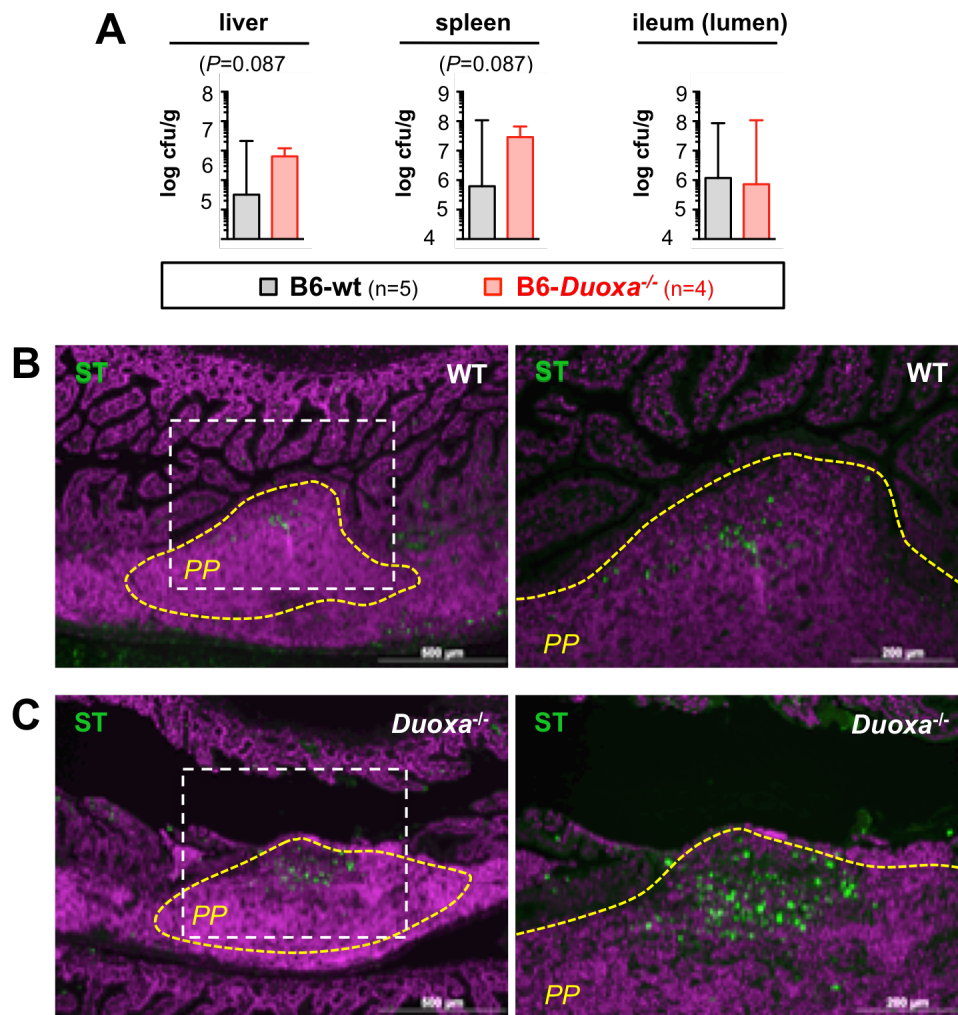

**Supplementary Figure S12.** Typhoid model of acute enteral *Salmonella* Typhimurium (ST) infection. B6 *Duoxa*<sup>-/-</sup> and wt littermates (10 generation of backcrossing onto C57BL/6 background; all homozygous for the G169D *Slc11a1* mutant) were orally infected with  $1.5 \times 10^7$  cfu ST without antibiotic conditioning. (A) Systemic dissemination (liver, spleen) and ileal colonization 48 h following infection. Data represent geometric means  $\pm$  95% CI. (B) Detection of ST within ileal Peyer's 48 h following oral gavage with ST. Indirect Immunofluorescence detection of ST-specific lipopolysaccharide (mAb clone 1E6; 1:1,000; Genetex; green). Purple, DNA counterstained with DAPI.

| adj. <i>P</i> | GO#                        | GO term               |
|---------------|----------------------------|-----------------------|
| 9.18E-06      | <a href="#">GO:0006952</a> | defense response      |
| 2.34E-05      | <a href="#">GO:0009611</a> | response to wounding  |
| 2.88E-05      | <a href="#">GO:0006954</a> | inflammatory response |
| 6.34E-04      | <a href="#">GO:0006955</a> | immune response       |

**Supplementary Figure S13.** Functional enrichment analysis of genes affected by DUOX status. Genes upregulated in *Duoxa*<sup>-/-</sup> mice (n=99 genes with mean >1.4 fold vs cohoused littermate controls) were tested for enrichment within the Biological Process terms subset of the Gene Ontology database using the g:GOST program<sup>23</sup>. Listed *P* values are adjusted for multiple comparisons using the Bonferroni *P* method.

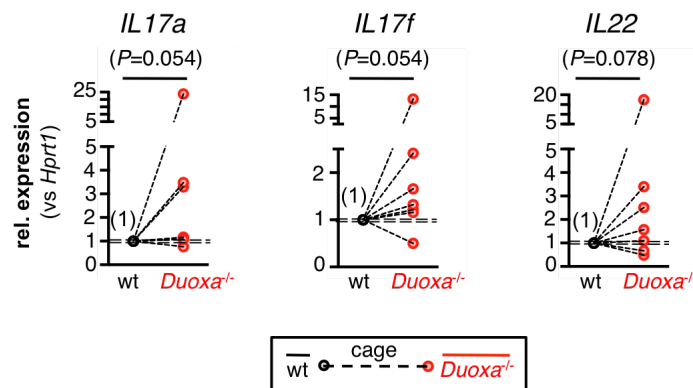

**Supplementary Figure S14.** Ileal expression of IL-17/22 cytokines. Mean expression in *Duoxa*<sup>-/-</sup> animals is plotted relative to the mean in co-housed wt littermates (set to 1). \*\*, *P*<.01; two-sided Wilcoxon matched-pairs signed rank test.

## Supplementary Table S15

### qPCR primers

#### *mouse mRNA-specific primers*

| name     | 5'-3' sequence          | gene          |
|----------|-------------------------|---------------|
| DUOXA2-F | GCCTGGCTTTGCTCACCA      | <i>Duoxa2</i> |
| DUOXA2-R | GAGGAGGAGGCTCAGGAT      |               |
| DUOXA1-F | CATCACCTCACAGGCACC      | <i>Duoxa1</i> |
| DUOXA1-R | GGAATGCCACCCACAGCA      |               |
| DUOX1-F  | CCCACGTTACCATTTCATCA    | <i>Duox1</i>  |
| DUOX1-R  | CATCTGCATAGCTGGCTGGA    |               |
| DUOX2-F  | GGACAGCATGCTTCCAACAAGT  | <i>Duox2</i>  |
| DUOX2-R  | GCCTGATAAACACCGTCAGCA   |               |
| NOX1-F   | CAGAGCCACTGACATCCTGA    | <i>Nox1</i>   |
| NOX1-R   | CAGACTCGAGTATCGCTGACA   |               |
| SAA1-F   | GCTACTCACCAGCCTGGTCT    | <i>Saa1</i>   |
| SAA1-R   | GGCCTCTCTTCCATCACTGA    |               |
| CCL20-F  | GTACTGCTGGCTCACCTCT     | <i>Ccl20</i>  |
| CCL20-R  | CATCTTCTTGACTCTTAGGCTGA |               |
| CXCL1-F  | CTGCACCCAAACCGAAGTCAT   | <i>Cxcl1</i>  |
| CXCL1-R  | TTGTCAGAAGCCAGCGTTCAC   |               |
| NOS2-F   | CTGAACTTGAGCGAGGAGCA    | <i>Nos2</i>   |
| NOS2-R   | GTGCCAGAAGCTGGAAGTCT    |               |
| IL17a-F  | GGACTCTCCACCGCAATGA     | <i>Il17a</i>  |
| IL17a-R  | GGCACTGAGCTTCCCAGATC    |               |
| IL17f-F  | CCCCATGGGATTACAACATCAC  | <i>Il17f</i>  |
| IL17f-R  | CATTGATGCAGCCTGAGTGTCT  |               |
| IL22-F   | CCCAGTCAGACAGGTCCA      | <i>Il22</i>   |
| IL22-R   | TGATCTCTCCACTCTCTCCA    |               |

#### *SFB-specific primers*

| name                  | 5'-3' sequence             | gene              |
|-----------------------|----------------------------|-------------------|
| SFB736F <sup>11</sup> | GACGCTGAGGCATGAGAGCAT      | 16S rDNA<br>(SFB) |
| SFB844R <sup>11</sup> | GACGGCACGGATTGTTATTCA      |                   |
| kat-F                 | GTAGATGGTAACTCGGGAAGTACT   | SFBM_1159         |
| kat-R                 | CTCCCATGGAACGAGCAGTGT      |                   |
| piplc-F               | CCTACTCTAGGAGAAGCAAGAGGA   | SFBM_0755         |
| piplc-R               | GGTAAAACCTCCACCATGACCATTCA |                   |
| myoag-F               | GTGGTGGCTGGGATATGTGGA      | SFBM_0327         |

|           |                           |              |
|-----------|---------------------------|--------------|
| myoag-R   | CACCCGACTAATTGACCCTTAGGT  |              |
| fibrobp-F | GCTGGTAGCCATGTTATCCTTGCA  | SFBM_0986    |
| fibrobp-R | CCATTCCTGGTTTGCATGTGGCA   |              |
| flic2-F   | GGTGTAAAGCATCGGGAATATGGGT | SFBM_0642    |
| flic2-R   | CAGCTGTGTTATCTGTTGATGCGA  |              |
| adprt-F   | GCGAGCTTCCCTCATTACAAGG    | SFBSU_007G84 |
| adprt-R   | ACCATCCTGAATCTTCTCCAACA   |              |

### ***bacteria group-specific primers***

| name                     | 5'-3' sequence          | gene                 |
|--------------------------|-------------------------|----------------------|
| UniF334 <sup>12</sup>    | ACTCCTACGGGAGGCAGCAGT   | 16S rDNA             |
| UniR514 <sup>12</sup>    | ATTACCGCGGCTGCTGGC      | (universal)          |
| 928F-Firm <sup>12</sup>  | TGAAACTYAAAGGAATTGACG   | 16S rDNA             |
| Firm1040R <sup>12</sup>  | ACCATGCACCACCTGTC       | (Firmicutes)         |
| 798cfbF <sup>12</sup>    | CRAACAGGATTAGATACCCT    | 16s rDNA             |
| cfb967R <sup>12</sup>    | GGTAAGGTTCTCGCGTAT      | (Bacteroidetes)      |
| 1080γF <sup>12</sup>     | TCGTCAGCTCGTGYGTGA      | 16S rDNA             |
| γ1202R <sup>12</sup>     | CGTAAGGGCCATGATG        | (γ-Proteobact.)      |
| Act920F3 <sup>12</sup>   | TACGGCCGCAAGGCTA        | 16S rDNA             |
| Act1200R <sup>12</sup>   | TCRTCCCCACCTTCTCCG      | (Actinobacteria)     |
| En-Isu-3F <sup>13</sup>  | TGCCGTAACCTCGGGAGAAGGCA | 23S rDNA             |
| En-Isu-3'R <sup>13</sup> | TCAAGGACCAGTGTTCAAGTGC  | (Enterobacteriaceae) |
| Ecoli-F <sup>14</sup>    | CATGCCGCGTGTATGAAGAA    | 16S rDNA             |
| Ecoli-R <sup>14</sup>    | CGGGTAACGTCAATGAGCAA    | ( <i>E. coli</i> )   |

## Supplementary Table S16

Genes upregulated in SFB<sup>mono</sup> (GSE18348)<sup>8</sup> and *Duoxa*<sup>-/-</sup> mice

(leading edge gene subset corresponding to left panel of Fig. 5D)

# of genes

up in SFB<sup>mono</sup> vs GF (>2.5 fold; p<0.05): 56

leading-edge subset (core enrichment): 37

| Gene name     | Rank in gene list | <i>Duoxa</i> <sup>-/-</sup> vs wt | Running ES | SFB <sup>mono</sup> vs GF |
|---------------|-------------------|-----------------------------------|------------|---------------------------|
| 1600029D21RIK | 0                 | 3.63                              | 0.09       | 13.15                     |
| SAA1          | 2                 | 2.47                              | 0.15       | 126.35                    |
| IFIT2         | 5                 | 1.99                              | 0.19       | 11.78                     |
| HEMT1         | 11                | 1.84                              | 0.23       | 6.06                      |
| SAA2          | 13                | 1.77                              | 0.27       | 12.96                     |
| HK2           | 21                | 1.65                              | 0.31       | 3.82                      |
| USP18         | 29                | 1.54                              | 0.33       | 3.30                      |
| PLA2G5        | 33                | 1.52                              | 0.36       | 3.95                      |
| CXCL9         | 50                | 1.45                              | 0.39       | 3.18                      |
| SLC28A2       | 57                | 1.41                              | 0.41       | 3.82                      |
| SMPDL3B       | 69                | 1.39                              | 0.43       | 5.11                      |
| ZBP1          | 83                | 1.36                              | 0.45       | 6.73                      |
| SLC6A14       | 98                | 1.34                              | 0.47       | 21.29                     |
| TIFA          | 104               | 1.33                              | 0.49       | 3.69                      |
| NOS2          | 107               | 1.33                              | 0.51       | 6.61                      |
| IGTP          | 125               | 1.31                              | 0.52       | 5.92                      |
| CASP4         | 129               | 1.30                              | 0.54       | 2.91                      |
| LY6D          | 154               | 1.29                              | 0.56       | 4.59                      |
| CCL28         | 236               | 1.24                              | 0.56       | 2.98                      |
| STOM          | 246               | 1.24                              | 0.58       | 3.24                      |
| CEBPD         | 254               | 1.24                              | 0.59       | 3.20                      |
| GBP6          | 268               | 1.23                              | 0.61       | 2.64                      |
| DMBT1         | 290               | 1.23                              | 0.62       | 3.13                      |
| BHMT          | 336               | 1.21                              | 0.63       | 4.80                      |
| NFKBIZ        | 378               | 1.21                              | 0.64       | 3.76                      |
| PTK6          | 381               | 1.21                              | 0.65       | 3.38                      |
| MPA2L         | 421               | 1.20                              | 0.66       | 3.17                      |
| IIGP2         | 440               | 1.20                              | 0.67       | 4.10                      |
| TGM2          | 454               | 1.19                              | 0.68       | 3.06                      |
| SOCS3         | 593               | 1.18                              | 0.68       | 4.52                      |
| MAL           | 642               | 1.17                              | 0.69       | 4.26                      |
| UPP1          | 720               | 1.16                              | 0.69       | 4.14                      |
| PSMB8         | 844               | 1.15                              | 0.69       | 3.75                      |
| GZMB          | 858               | 1.15                              | 0.70       | 9.68                      |
| TCRB-J        | 1090              | 1.14                              | 0.69       | 2.60                      |
| CD38          | 1113              | 1.14                              | 0.70       | 6.08                      |
| SERPINA3G     | 1180              | 1.13                              | 0.70       | 2.88                      |

## Supplementary Table S17

Genes downregulated in SFB<sup>mono</sup> (GSE18348)<sup>8</sup> and *Duoxa*<sup>-/-</sup> mice  
(leading edge gene subset corresponding to right panel of Fig. 5D)

|                                                        |            |
|--------------------------------------------------------|------------|
|                                                        | # of genes |
| down in SFB <sup>mono</sup> vs GF (>0.6 fold; p<0.05): | 65         |
| leading-edge subset (core enrichment):                 | 20         |

| Gene name     | Rank in gene list | <i>Duoxa</i> <sup>-/-</sup> vs wt | Running ES | SFB <sup>mono</sup> vs GF |
|---------------|-------------------|-----------------------------------|------------|---------------------------|
| SLC5A4A       | 13782             | 0.59                              | 0.00       | 0.33                      |
| SLC5A4B       | 13779             | 0.65                              | -0.06      | 0.35                      |
| 1300013J15RIK | 13776             | 0.68                              | -0.11      | 0.49                      |
| FMO5          | 13775             | 0.68                              | -0.16      | 0.34                      |
| SLC7A8        | 13772             | 0.70                              | -0.20      | 0.41                      |
| VMD2L1        | 13761             | 0.72                              | -0.24      | 0.41                      |
| FABP1         | 13694             | 0.77                              | -0.28      | 0.54                      |
| ACY1          | 13687             | 0.77                              | -0.31      | 0.51                      |
| 2810439F02RIK | 13666             | 0.78                              | -0.33      | 0.46                      |
| AQP7          | 13606             | 0.80                              | -0.36      | 0.36                      |
| BC089597      | 13552             | 0.81                              | -0.38      | 0.23                      |
| VWA1          | 13538             | 0.81                              | -0.40      | 0.51                      |
| CYP3A11       | 13505             | 0.82                              | -0.43      | 0.27                      |
| ARG2          | 13494             | 0.82                              | -0.45      | 0.46                      |
| CYP2D26       | 13464             | 0.82                              | -0.47      | 0.54                      |
| C1QDC2        | 13463             | 0.82                              | -0.49      | 0.52                      |
| SPSB4         | 13423             | 0.83                              | -0.51      | 0.48                      |
| PLOD2         | 13165             | 0.85                              | -0.51      | 0.43                      |
| DNMT2         | 13019             | 0.86                              | -0.52      | 0.44                      |
| FBP1          | 12989             | 0.86                              | -0.54      | 0.42                      |

## Supplementary Table S18

Genes upregulated in B6-Jax cohoused with B6-Tac (GSE18348)<sup>8</sup>  
and in *Duoxa*<sup>-/-</sup> mice

(leading edge gene subset corresponding to left panel of Fig. 5E)

|                                             |            |
|---------------------------------------------|------------|
|                                             | # of genes |
| up in Jax(+Tac) vs Jax (>2.5 fold; p<0.05): | 71         |
| leading-edge subset (core enrichment):      | 46         |

| Gene name | Rank in gene list | <i>Duoxa</i> <sup>-/-</sup> vs wt | Running ES | Jax(+Tac) vs Jax |
|-----------|-------------------|-----------------------------------|------------|------------------|
| Plet1     | 0                 | 3.63                              | 0.07       | 77.30            |
| SAA1      | 2                 | 2.47                              | 0.12       | 28.04            |
| RETNLB    | 4                 | 2.06                              | 0.16       | 46.51            |
| UBD       | 10                | 1.85                              | 0.20       | 5.21             |
| HEMT1     | 11                | 1.84                              | 0.23       | 19.74            |
| SAA2      | 13                | 1.77                              | 0.26       | 11.07            |
| FUT2      | 20                | 1.66                              | 0.29       | 13.80            |
| HK2       | 21                | 1.65                              | 0.32       | 5.15             |
| SLFN4     | 24                | 1.60                              | 0.34       | 2.66             |
| PLA2G5    | 33                | 1.52                              | 0.36       | 10.10            |
| SAA3      | 40                | 1.49                              | 0.39       | 3.06             |
| CEACAM10  | 48                | 1.45                              | 0.41       | 3.10             |
| CXCL9     | 50                | 1.45                              | 0.43       | 3.58             |
| SMPDL3B   | 69                | 1.39                              | 0.44       | 2.96             |
| IIGP1     | 79                | 1.38                              | 0.46       | 2.55             |
| ZBP1      | 83                | 1.36                              | 0.48       | 3.08             |
| ADM       | 86                | 1.36                              | 0.50       | 2.89             |
| SLC6A14   | 98                | 1.34                              | 0.51       | 3.24             |
| TIFA      | 104               | 1.33                              | 0.53       | 4.33             |
| NOS2      | 107               | 1.33                              | 0.54       | 8.23             |
| IGK-V32   | 116               | 1.32                              | 0.56       | 4.33             |
| TAT       | 117               | 1.32                              | 0.57       | 8.79             |
| LY6D      | 154               | 1.29                              | 0.58       | 3.69             |
| MYL7      | 161               | 1.29                              | 0.60       | 2.70             |
| SLC5A9    | 178               | 1.27                              | 0.61       | 2.87             |
| LY6A      | 183               | 1.27                              | 0.62       | 3.43             |
| CD177     | 225               | 1.25                              | 0.63       | 4.63             |
| STEAP1    | 243               | 1.24                              | 0.64       | 4.85             |
| STOM      | 246               | 1.24                              | 0.65       | 4.18             |
| CEBPD     | 254               | 1.24                              | 0.66       | 3.44             |
| DMBT1     | 290               | 1.23                              | 0.67       | 3.17             |
| BHMT      | 336               | 1.21                              | 0.68       | 5.10             |
| PTK6      | 381               | 1.21                              | 0.69       | 2.61             |
| TGM2      | 454               | 1.19                              | 0.69       | 3.29             |
| MUC4      | 473               | 1.19                              | 0.70       | 2.60             |
| SOCS3     | 593               | 1.18                              | 0.70       | 8.16             |



|           |      |      |      |      |
|-----------|------|------|------|------|
| IL18      | 601  | 1.17 | 0.71 | 4.31 |
| MAL       | 642  | 1.17 | 0.72 | 5.35 |
| UPP1      | 720  | 1.16 | 0.72 | 2.65 |
| AQP4      | 787  | 1.16 | 0.72 | 6.52 |
| GZMB      | 858  | 1.15 | 0.72 | 3.83 |
| CD38      | 1113 | 1.14 | 0.71 | 5.14 |
| SERPINA3G | 1180 | 1.13 | 0.71 | 3.27 |
| PFKFB3    | 1196 | 1.13 | 0.72 | 6.41 |
| RDH16     | 1198 | 1.13 | 0.73 | 2.66 |
| CCND1     | 1243 | 1.13 | 0.73 | 2.56 |

## Supplementary Table S19

Genes downregulated in B6-Jax cohoused with B6-Tac (GSE18348) <sup>8</sup>

and in *Duoxa*<sup>-/-</sup> mice

(leading edge gene subset corresponding to right panel of Fig. 5E)

|                                               |            |
|-----------------------------------------------|------------|
|                                               | # of genes |
| down in Jax(+Tac) vs Jax (<0.5 fold; p<0.05): | 141        |
| leading-edge subset (core enrichment):        | 70         |

| Gene name     | Rank in gene list | <i>Duoxa</i> <sup>-/-</sup> vs wt | Running ES | Jax(+Tac) vs Jax |
|---------------|-------------------|-----------------------------------|------------|------------------|
| SUSD2         | 13787             | 0.56                              | 0.00       | 0.37             |
| SLC5A4A       | 13782             | 0.59                              | -0.03      | 0.28             |
| SLC5A4B       | 13779             | 0.65                              | -0.06      | 0.44             |
| 1300013J15RIK | 13776             | 0.68                              | -0.08      | 0.23             |
| FMO5          | 13775             | 0.68                              | -0.10      | 0.21             |
| PCK1          | 13774             | 0.68                              | -0.12      | 0.20             |
| TREH          | 13757             | 0.73                              | -0.14      | 0.42             |
| CYP27A1       | 13754             | 0.73                              | -0.16      | 0.38             |
| OPLAH         | 13726             | 0.75                              | -0.17      | 0.44             |
| CES1          | 13699             | 0.76                              | -0.19      | 0.27             |
| FABP1         | 13694             | 0.77                              | -0.20      | 0.34             |
| BMP8B         | 13693             | 0.77                              | -0.22      | 0.37             |
| METTL7A       | 13682             | 0.77                              | -0.23      | 0.35             |
| AI451617      | 13675             | 0.78                              | -0.24      | 0.41             |
| BC021608      | 13673             | 0.78                              | -0.26      | 0.26             |
| 2810439F02RIK | 13666             | 0.78                              | -0.27      | 0.31             |
| CUBN          | 13660             | 0.79                              | -0.28      | 0.20             |
| BST1          | 13627             | 0.79                              | -0.29      | 0.36             |
| AQP7          | 13606             | 0.80                              | -0.30      | 0.19             |
| SULT1A1       | 13561             | 0.81                              | -0.31      | 0.36             |
| BC089597      | 13552             | 0.81                              | -0.32      | 0.44             |
| VWA1          | 13538             | 0.81                              | -0.33      | 0.30             |
| SLC5A11       | 13508             | 0.82                              | -0.34      | 0.30             |
| CYP3A11       | 13505             | 0.82                              | -0.35      | 0.05             |
| ARG2          | 13494             | 0.82                              | -0.36      | 0.22             |
| SLC6A20A      | 13489             | 0.82                              | -0.37      | 0.26             |
| SELENBP1      | 13465             | 0.82                              | -0.38      | 0.34             |
| CYP2D26       | 13464             | 0.82                              | -0.39      | 0.18             |
| C1QDC2        | 13463             | 0.82                              | -0.40      | 0.40             |
| CAT           | 13434             | 0.83                              | -0.41      | 0.84             |
| SPSB4         | 13423             | 0.83                              | -0.42      | 0.40             |
| ABCC2         | 13390             | 0.83                              | -0.43      | 0.19             |
| C920025E04RIK | 13384             | 0.83                              | -0.44      | 0.31             |
| OSBPL1A       | 13378             | 0.83                              | -0.45      | 0.43             |
| SLC22A4       | 13369             | 0.84                              | -0.46      | 0.41             |
| EPHX2         | 13335             | 0.84                              | -0.46      | 0.38             |

|               |       |      |       |      |
|---------------|-------|------|-------|------|
| CYP3A25       | 13330 | 0.84 | -0.47 | 0.20 |
| PDZK1         | 13258 | 0.84 | -0.48 | 0.24 |
| ALDH1A7       | 13229 | 0.85 | -0.48 | 0.44 |
| CML5          | 13209 | 0.85 | -0.49 | 0.37 |
| PLOD2         | 13165 | 0.85 | -0.50 | 0.27 |
| GPR172B       | 13156 | 0.85 | -0.51 | 0.44 |
| TSPAN5        | 13133 | 0.85 | -0.51 | 0.39 |
| CBR1          | 13096 | 0.86 | -0.52 | 0.42 |
| METTL7A       | 13026 | 0.86 | -0.52 | 0.41 |
| DNMT2         | 13019 | 0.86 | -0.53 | 0.43 |
| FBP1          | 12989 | 0.86 | -0.54 | 0.29 |
| EHHADH        | 12924 | 0.87 | -0.54 | 0.41 |
| TBC1D24       | 12893 | 0.87 | -0.54 | 0.36 |
| GUCA2B        | 12878 | 0.87 | -0.55 | 0.39 |
| TMEM43        | 12876 | 0.87 | -0.56 | 0.41 |
| TYKI          | 12851 | 0.87 | -0.56 | 0.23 |
| NR1D2         | 12834 | 0.87 | -0.57 | 0.43 |
| CYP4V3        | 12694 | 0.88 | -0.57 | 0.18 |
| HEXB          | 12653 | 0.88 | -0.57 | 0.39 |
| MME           | 12599 | 0.88 | -0.57 | 0.14 |
| AW491445      | 12459 | 0.89 | -0.57 | 0.25 |
| UGT2B5        | 12445 | 0.89 | -0.58 | 0.25 |
| PPARGC1A      | 12443 | 0.89 | -0.58 | 0.29 |
| RDH7          | 12413 | 0.89 | -0.59 | 0.09 |
| CYP3A44       | 12386 | 0.89 | -0.59 | 0.32 |
| HSD17B4       | 12378 | 0.89 | -0.60 | 0.42 |
| ANGPTL4       | 12284 | 0.89 | -0.60 | 0.21 |
| BMP1          | 12183 | 0.90 | -0.60 | 0.43 |
| CYP4B1        | 12051 | 0.90 | -0.59 | 0.35 |
| APOC3         | 11983 | 0.90 | -0.59 | 0.23 |
| THRSP         | 11886 | 0.91 | -0.59 | 0.42 |
| SLC5A6        | 11827 | 0.91 | -0.59 | 0.38 |
| MMP15         | 11803 | 0.91 | -0.59 | 0.44 |
| 0610009A07RIK | 11795 | 0.91 | -0.60 | 0.39 |

## Supplementary Table S20

Genes upregulated in cCD (Ref. 9, Tbl. S10) and *Duoxa*<sup>-/-</sup> mice

(leading edge gene subset corresponding to upper panel of Fig. 6C)

|                                         |            |
|-----------------------------------------|------------|
|                                         | # of genes |
| upregulated in cCD vs Ctrl:             | 287        |
| with expression data for mouse homolog: | 172        |
| leading-edge subset (core enrichment):  | 53         |

| Gene name | Rank in gene list | <i>Duoxa</i> <sup>-/-</sup> vs wt | Running ES | cCD vs Ctrl |
|-----------|-------------------|-----------------------------------|------------|-------------|
| ST3GAL4   | 0                 | 2.55                              | 0.04       | 2.12        |
| SAA1      | 1                 | 2.47                              | 0.08       | 5.82        |
| IL1RL1    | 2                 | 2.30                              | 0.11       | 1.65        |
| IFI44     | 6                 | 1.87                              | 0.14       | 1.54        |
| SAA2      | 12                | 1.77                              | 0.16       | 5.98        |
| MMP3      | 13                | 1.76                              | 0.19       | 15.13       |
| S100A9    | 15                | 1.68                              | 0.21       | 6.04        |
| HK2       | 19                | 1.65                              | 0.23       | 2.75        |
| AREG      | 20                | 1.64                              | 0.25       | 2.26        |
| TLR2      | 23                | 1.58                              | 0.27       | 1.94        |
| S100A8    | 24                | 1.55                              | 0.29       | 8.62        |
| CXCL10    | 27                | 1.54                              | 0.31       | 4.24        |
| TLR4      | 29                | 1.53                              | 0.32       | 1.73        |
| CXCL1     | 35                | 1.50                              | 0.34       | 3.63        |
| IL1B      | 43                | 1.45                              | 0.36       | 6.42        |
| CXCL9     | 46                | 1.45                              | 0.37       | 4.53        |
| CXCL11    | 50                | 1.42                              | 0.39       | 4.94        |
| CXCL5     | 64                | 1.39                              | 0.40       | 9.24        |
| CA1       | 68                | 1.38                              | 0.41       | 2.81        |
| ZBP1      | 74                | 1.36                              | 0.42       | 1.87        |
| ADM       | 77                | 1.36                              | 0.44       | 2.05        |
| SLC6A14   | 88                | 1.34                              | 0.45       | 7.32        |
| TIFA      | 94                | 1.33                              | 0.46       | 1.57        |
| LY6D      | 135               | 1.29                              | 0.47       | 2.70        |
| CD177     | 194               | 1.25                              | 0.47       | 4.69        |
| SLAMF7    | 203               | 1.24                              | 0.48       | 1.88        |
| CCL28     | 204               | 1.24                              | 0.49       | 2.34        |
| STEAP1    | 210               | 1.24                              | 0.50       | 1.99        |
| MTHFD2    | 222               | 1.24                              | 0.51       | 1.63        |
| DMBT1     | 244               | 1.23                              | 0.51       | 2.16        |
| MSR1      | 268               | 1.22                              | 0.52       | 1.70        |
| ADAMTS1   | 296               | 1.21                              | 0.52       | 1.71        |
| ANXA3     | 304               | 1.21                              | 0.53       | 1.66        |
| NFKBIZ    | 315               | 1.21                              | 0.54       | 2.33        |
| STEAP4    | 347               | 1.20                              | 0.54       | 2.18        |

|          |     |      |      |      |
|----------|-----|------|------|------|
| TGM2     | 374 | 1.19 | 0.55 | 1.89 |
| MUC4     | 391 | 1.19 | 0.56 | 5.30 |
| TNFRSF17 | 405 | 1.19 | 0.56 | 1.60 |
| DUSP6    | 472 | 1.18 | 0.56 | 1.57 |
| STAT1    | 542 | 1.17 | 0.56 | 2.36 |
| CD274    | 548 | 1.17 | 0.57 | 2.31 |
| GBP1     | 555 | 1.17 | 0.57 | 2.57 |
| NPL      | 686 | 1.15 | 0.57 | 1.57 |
| CH25H    | 723 | 1.15 | 0.57 | 1.71 |
| PTGFR    | 724 | 1.15 | 0.58 | 1.52 |
| CD86     | 772 | 1.15 | 0.58 | 1.62 |
| CYP7B1   | 776 | 1.15 | 0.58 | 1.85 |
| CCR1     | 782 | 1.15 | 0.59 | 1.73 |
| MMP10    | 809 | 1.14 | 0.59 | 9.42 |
| KCNE3    | 883 | 1.14 | 0.59 | 1.70 |
| CD38     | 897 | 1.14 | 0.60 | 1.76 |
| LCP2     | 918 | 1.13 | 0.60 | 1.50 |
| GBP4     | 961 | 1.13 | 0.60 | 1.91 |

## Supplementary Table S21

Genes downregulated in ileum of cCD patients<sup>9</sup> and *Duoxa*<sup>-/-</sup> mice  
(leading edge gene subset corresponding to lower panel of Fig. 6C)

|                                         |            |
|-----------------------------------------|------------|
|                                         | # of genes |
| downregulated in cCD vs Ctrl:           | 285        |
| with expression data for mouse homolog: | 163        |
| leading-edge subset (core enrichment):  | 72         |

| Gene name | Rank in gene list | <i>Duoxa</i> <sup>-/-</sup> vs wt | Running ES | cCD vs Ctrl |
|-----------|-------------------|-----------------------------------|------------|-------------|
| SUSD2     | 11293             | 0.56                              | 0.00       | 0.34        |
| SLC2A2    | 11286             | 0.66                              | -0.03      | 0.36        |
| FMO5      | 11284             | 0.68                              | -0.06      | 0.53        |
| PCK1      | 11283             | 0.68                              | -0.08      | 0.36        |
| TREH      | 11268             | 0.73                              | -0.10      | 0.30        |
| PDK2      | 11267             | 0.73                              | -0.12      | 0.62        |
| HMGCS2    | 11261             | 0.73                              | -0.14      | 0.27        |
| XPNPEP2   | 11260             | 0.73                              | -0.15      | 0.26        |
| REEP6     | 11252             | 0.75                              | -0.17      | 0.31        |
| LEAP2     | 11232             | 0.76                              | -0.19      | 0.44        |
| ACE       | 11225             | 0.76                              | -0.20      | 0.45        |
| ESPN      | 11216             | 0.77                              | -0.22      | 0.57        |
| ACY1      | 11208             | 0.77                              | -0.23      | 0.62        |
| OSR2      | 11207             | 0.77                              | -0.25      | 0.60        |
| ANPEP     | 11186             | 0.79                              | -0.26      | 0.48        |
| AQP1      | 11154             | 0.80                              | -0.27      | 0.63        |
| CD8B      | 11139             | 0.80                              | -0.28      | 0.55        |
| AQP7      | 11137             | 0.80                              | -0.30      | 0.31        |
| METTL7B   | 11124             | 0.80                              | -0.31      | 0.59        |
| DBP       | 11121             | 0.80                              | -0.32      | 0.60        |
| SLC5A11   | 11050             | 0.82                              | -0.33      | 0.33        |
| SEMA6C    | 11044             | 0.82                              | -0.34      | 0.67        |
| SLC15A1   | 11036             | 0.82                              | -0.35      | 0.36        |
| CYP2S1    | 11017             | 0.82                              | -0.36      | 0.57        |
| SLC13A2   | 10964             | 0.83                              | -0.37      | 0.36        |
| SLC13A1   | 10919             | 0.84                              | -0.37      | 0.29        |
| EPHX2     | 10898             | 0.84                              | -0.38      | 0.61        |
| SULT2B1   | 10874             | 0.84                              | -0.39      | 0.50        |
| GGT1      | 10871             | 0.84                              | -0.40      | 0.60        |
| HTR1D     | 10863             | 0.84                              | -0.41      | 0.37        |
| PDZK1     | 10832             | 0.84                              | -0.42      | 0.36        |
| SOAT2     | 10820             | 0.85                              | -0.42      | 0.20        |
| ABP1      | 10793             | 0.85                              | -0.43      | 0.58        |
| SI        | 10745             | 0.85                              | -0.44      | 0.46        |
| ABCG8     | 10732             | 0.85                              | -0.45      | 0.50        |
| TM6SF2    | 10701             | 0.85                              | -0.45      | 0.36        |

|          |       |      |       |      |
|----------|-------|------|-------|------|
| GAL3ST1  | 10680 | 0.86 | -0.46 | 0.40 |
| SLC9A3R1 | 10677 | 0.86 | -0.47 | 0.62 |
| SLC39A4  | 10676 | 0.86 | -0.48 | 0.53 |
| BCAN     | 10668 | 0.86 | -0.49 | 0.63 |
| FBP1     | 10593 | 0.86 | -0.49 | 0.49 |
| DNASE1   | 10549 | 0.87 | -0.49 | 0.39 |
| ACOX2    | 10537 | 0.87 | -0.50 | 0.57 |
| ITIH3    | 10534 | 0.87 | -0.51 | 0.31 |
| KHK      | 10216 | 0.88 | -0.49 | 0.38 |
| GPD1     | 10195 | 0.88 | -0.49 | 0.42 |
| CHAD     | 10179 | 0.89 | -0.50 | 0.45 |
| SLC6A4   | 10168 | 0.89 | -0.50 | 0.27 |
| DAK      | 10158 | 0.89 | -0.51 | 0.59 |
| DPEP1    | 10007 | 0.89 | -0.50 | 0.31 |
| CLDN15   | 9983  | 0.89 | -0.51 | 0.53 |
| MLXIPL   | 9953  | 0.90 | -0.51 | 0.48 |
| PKLR     | 9936  | 0.90 | -0.52 | 0.30 |
| AMN      | 9892  | 0.90 | -0.52 | 0.44 |
| GP2      | 9859  | 0.90 | -0.52 | 0.39 |
| NPY      | 9855  | 0.90 | -0.53 | 0.32 |
| APOC3    | 9742  | 0.90 | -0.53 | 0.23 |
| PHYH     | 9734  | 0.90 | -0.53 | 0.56 |
| SFRP5    | 9666  | 0.91 | -0.53 | 0.24 |
| DGAT1    | 9578  | 0.91 | -0.53 | 0.60 |
| C6       | 9536  | 0.91 | -0.53 | 0.21 |
| KLKB1    | 9518  | 0.91 | -0.53 | 0.52 |
| TM4SF5   | 9511  | 0.91 | -0.54 | 0.37 |
| ASPA     | 9433  | 0.91 | -0.54 | 0.47 |
| SLC22A5  | 9422  | 0.92 | -0.54 | 0.58 |
| MEP1A    | 9252  | 0.92 | -0.53 | 0.50 |
| FGFR3    | 9235  | 0.92 | -0.53 | 0.65 |
| RDH5     | 9203  | 0.92 | -0.54 | 0.64 |
| LCT      | 9181  | 0.92 | -0.54 | 0.19 |
| NR1I3    | 9081  | 0.93 | -0.54 | 0.42 |
| HSD3B1   | 9079  | 0.93 | -0.54 | 0.30 |
| RGS11    | 9070  | 0.93 | -0.54 | 0.59 |
